# Supplementary material for: Tumor regression mediated by oncogene withdrawal or erlotinib stimulates infiltration of inflammatory immune cells in EGFR mutant lung tumors
Source: J Immunother Cancer. 2019 Jul 10;7:172. doi: 10.1186/s40425-019-0643-8 (PMC6617639; doi:10.1186/s40425-019-0643-8)
Supplement: Supplementary file 1 — Figure S1. MRI images, histology and representative flow cytometry plots of normal or tumor-bearing lungs before and after erlotinib. (A) Coronal images of CCSPrtTA; TetO-EGFRL858R mouse lungs before (left panel) and after (right panel) treatment with erlotinib. (B) Hematoxylin and eosin (H&E) stain of lungs from control (normal) and tumor bearing CCSP-rtTA; TetO-EGFRL858R mice in the absence (−) and presence (+) of erlotinib for 2 weeks. Bar: 50 μm. Absolute number of (C) CD4 and (D) CD8 T cells normalized to weight of lungs of control (normal) and tumor bearing CCSP-rtTA; TetO-EGFRL858R mice in the absence (−) and presence (+) of erlotinib for 2 weeks. Representative FACS plot showing percentage of (E) FoxP3+ and FoxP3- CD4+ T cells (F) PD1+ FoxP3+ T cells. (G) Immunofluorescence (IF) stain of lung epithelial cells (green), CD3 T cells (red) and FoxP3 Tregs (Cyan). Nuclei were counterstained with Dapi (blue) (H) Quantification of FoxP3+ CD3 T cells in lung tumor bearing CCSP-rtTA; TetO-EGFRL858R mice in the absence (−) and presence (+) of erlotinib for 2 weeks stained by IF. Data are shown as mean ± SD and * is P < 0.05 in a student’s t-test. NS, non-significant. Figure S2. Representative flow cytometry plots of cytokine producing T cells and gene expression profile of T cells isolated from tumor-bearing lungs before and after erlotinib. Representative FACS plots showing the percentage of (A) TNF-α+, IFN-γ+, and IL-2+ CD4 T cells. (B) Quantification of GzmB+ CD4 and CD8 T cells after PMA/ionomycin stimulation and intracellular cytokine staining of cells in the lungs of tumor bearing CCSP-rtTA; TetO-EGFRL858R mice in the absence (−) and presence (+) of erlotinib for 2 weeks. (C) Representative FACS plot showing percentage of GzmB+ splenic CD8 T cells after PMA/ionomycin stimulation and intracellular cytokine staining of cells. (D) CD8 and (E) CD4 T cells isolated from CCSP-rtTA; TetO-EGFRL858R tumor bearing mice untreated or treated with erlotinib. Heatmap was gene [file 40425_2019_643_MOESM1_ESM.xlsx]

## Sheet: CD4 CanonicalPathways
Rank	Ingenuity Canonical Pathways	-log(p-value)	P value	Ratio	#Molecules of dataset/#Total molecules of the pathway	z-score	Molecules
1	Granulocyte Adhesion and Diapedesis	4.73E00	1.86209e-05	1.36E-01	24/177	NaN	IL1A,VCAM1,SDC1,MMP15,CLDN18,GNAI1,FPR2,CCL17,CCL22,MMP2,CLDN7,Cxcl9,C5,IL18,ITGAM,CCL2,CLDN8,CLDN4,CLDN1,SDC2,MMP8,Cxcl3,CXCL17,Ccl6
2	Agranulocyte Adhesion and Diapedesis	4.72E00	1.90546e-05	1.32E-01	25/189	NaN	IL1A,VCAM1,FN1,CLDN18,MMP15,GNAI1,CCL17,CCL22,MYH7,MMP2,CXCR1,MYH11,CLDN7,Cxcl9,C5,IL18,CCL2,CLDN8,CLDN4,ACTA2,CLDN1,MMP8,CXCL17,Cxcl3,Ccl6
3	Atherosclerosis Signaling	4.47E00	3.38844e-05	1.5E-01	19/127	NaN	PNPLA8,IL1A,VCAM1,MSR1,ABHD3,PLA2G1B,PCYOX1,F3,PDGFC,ALOXE3,COL1A2,PLA2G4A,COL1A1,LYZ,IL18,CCL2,LPL,ALOX5,CLU
4	Eicosanoid Signaling	4.42E00	3.80189e-05	1.94E-01	13/67	-2.236	PNPLA8,PLA2G4A,PTGES,AKR1C3,DPEP3,ABHD3,LTC4S,PTGS1,PLA2G1B,FPR2,CYSLTR1,ALOX5,DPEP2
5	Leukocyte Extravasation Signaling	4.38E00	4.16869e-05	1.24E-01	26/210	-2.683	MMP15,CLDN7,MAPK13,BCAR1,FGFR3,CLDN4,TIMP1,MMP8,SRC,VCAM1,ARHGAP6,CLDN18,GNAI1,BMX,MMP2,F11R,ITGAM,ACTA2,CLDN8,CLDN1,RAP1GAP,PLCG2,FER,PIK3R6,CTTN,ARHGAP8/PRR5-ARHGAP8
6	Phagosome Formation	4.18E00	6.60693e-05	1.48E-01	18/122	NaN	FN1,MSR1,TLR8,FGFR3,PLCD3,CLEC7A,PLCB4,RHOQ,TLR5,PLCG2,SYK,RHOU,PIK3R6,TLR7,Tlr13,TLR3,FCGR3A/FCGR3B,MARCO
7	Hepatic Fibrosis / Hepatic Stellate Cell Activation	4.04E00	9.12011e-05	1.26E-01	23/183	NaN	IL1A,CCR5,VCAM1,FN1,COL4A5,LHX2,LEPR,MYH7,MMP2,MYH11,PDGFC,PGF,MET,COL1A2,COL1A1,COL6A1,CCL2,ACTA2,TIMP1,TGFB2,COL4A4,LBP,EGFR
8	Coagulation System	3.44E00	0.000363078	2.29E-01	8/35	-0.707	KNG1,F10,PROS1,PLAUR,F7,F3,SERPIND1,PLAT
9	Sertoli Cell-Sertoli Cell Junction Signaling	3.37E00	0.00042658	1.18E-01	21/178	NaN	SPTBN2,SRC,CLDN18,IGSF5,MAPK13,CLDN7,BCAR1,PLS1,OCLN,F11R,EPN2,PRKAR2B,CLDN8,CLDN4,ACTA2,SORBS1,CLDN1,TUBB4A,TUBA1C,ELK1,NECTIN2
10	TREM1 Signaling	3.31E00	0.000489779	1.6E-01	12/75	-2.887	Naip1 (includes others),IL18,NLRP3,CCL2,TLR5,PLCG2,NLRP10,TLR7,TLR8,Tlr13,TLR3,ITGAX
11	Paxillin Signaling	3.09E00	0.000812831	1.33E-01		-2.121	ITGAD,SRC,PARVA,MAPK13,ITGB8,BCAR1,FGFR3,DOCK1,ITGAM,ACTA2,ITGA9,PIK3R6,ITGB6,ITGB5,ITGAX
12	Role of Pattern Recognition Receptors in Recognition of Bacteria and Viruses	3.08E00	0.000831764	1.24E-01		-2.121	IL1A,OAS1,NLRP3,LIF,IL5,TLR8,C5,FGFR3,CLEC7A,IL18,TLR5,PLCG2,SYK,PIK3R6,TLR7,TGFB2,TLR3
13	Toll-like Receptor Signaling	2.81E00	0.00154882	1.49E-01		-2.333	IL1A,IL18,TLR5,TICAM2,TLR7,TLR8,LBP,MAPK13,TLR3,ELK1,TIRAP
14	LXR/RXR Activation	2.78E00	0.00165959	1.24E-01		0.302	KNG1,SCD,IL1A,MSR1,SERPINF1,ARG2,PCYOX1,LYZ,IL18,CCL2,LPL,LBP,TLR3,CYP51A1,CLU
15	Role of Tissue Factor in Cancer	2.75E00	0.00177828	1.23E-01		NaN	SRC,GNA12,HBEGF,PLAUR,F7,MAPK13,F3,FRK,FGFR3,F10,PIK3R6,RPS6KA2,CYR61,ITGB5,EGFR
16	Tight Junction Signaling	2.53E00	0.00295121	1.08E-01		NaN	F2RL2,RAB13,CLDN18,IGSF5,MYH7,MYH11,CLDN7,OCLN,F11R,PRKAR2B,ACTA2,CLDN8,CLDN4,CLDN1,PPM1L,CEBPA,TGFB2,NECTIN2
17	Choline Biosynthesis III	2.44E00	0.00363078	3.08E-01		NaN	CHPT1,PHKA1,PLD1,PCYT1A
18	Inhibition of Matrix Metalloproteases	2.43E00	0.00371535	1.79E-01		NaN	SDC1,TIMP1,SDC2,MMP8,RECK,MMP15,MMP2
19	Caveolar-mediated Endocytosis Signaling	2.42E00	0.00380189	1.41E-01		NaN	ITGAD,SRC,ITGAM,ACTA2,ITGA9,ITGB8,ITGB6,ITGB5,ITGAX,EGFR
20	Phosphatidylcholine Biosynthesis I	2.37E00	0.0042658	4.29E-01		NaN	CHPT1,PHKA1,PCYT1A
21	Noradrenaline and Adrenaline Degradation	2.36E00	0.00436516	1.75E-01		NaN	ALDH2,MAOB,ALDH1L1,DHRS9,COMT,ADHFE1,MAOA
22	Phospholipases	2.32E00	0.0047863	1.45E-01		NaN	PNPLA8,PLCD3,PLA2G4A,PLCB4,ABHD3,PLCG2,PLA2G1B,PLA1A,PLD1
23	Leukotriene Biosynthesis	2.31E00	0.00489779	2.86E-01		NaN	DPEP3,LTC4S,ALOX5,DPEP2
24	Phenylalanine Degradation IV (Mammalian, via Side Chain)	2.31E00	0.00489779	2.86E-01		NaN	ALDH2,MAOB,ACSF3,MAOA
25	Sphingosine-1-phosphate Signaling	2.29E00	0.00512861	1.14E-01		-2.887	GNA12,GNAI1,PDGFC,ASAH2,FGFR3,ADCY9,PLCD3,PLCB4,NAAA,RHOQ,PLCG2,RHOU,PIK3R6,SPHK1
26	Communication between Innate and Adaptive Immune Cells	2.17E00	0.00676083	1.24E-01		NaN	IL1A,IL18,IL5,CD80,TLR5,TNFSF13,TLR7,TLR8,Tlr13,TLR3,TNFRSF13C
27	ILK Signaling	2.14E00	0.00724436	9.69E-02		-2.828	PARVA,FN1,MYH7,MYH11,ITGB8,PDGFC,PGF,FGFR3,DOCK1,RHOQ,ACTA2,SH2B2,PPM1L,RHOU,PIK3R6,KRT18,ITGB6,ITGB5,DSP
28	Extrinsic Prothrombin Activation Pathway	2.09E00	0.00812831	2.5E-01		-1.000	F10,PROS1,F7,F3
29	Ovarian Cancer Signaling	2.06E00	0.00870964	1.04E-01		NaN	SRC,GJA1,PTGS1,MMP2,PDGFC,PGF,RAD51,FGFR3,FZD8,PRKAR2B,FZD4,WNT7A,PIK3R6,BRCA1,EGFR
30	Macropinocytosis Signaling	2.02E00	0.00954993	1.23E-01		-2.449	MET,FGFR3,SRC,PLCG2,PIK3R6,ITGB8,RAB34,ITGB6,PDGFC,ITGB5
31	Epithelial Adherens Junction Signaling	2.01E00	0.00977237	1.03E-01		NaN	SRC,ACVR1,MYH7,MYH11,MET,EPN2,MAGI1,ACTA2,SORBS1,FER,TGFB2,TUBA1C,TUBB4A,EGFR,NECTIN2
32	HMGB1 Signaling	2E00	0.01	1.05E-01		-3.742	VCAM1,IL1A,LIF,IL5,MAPK13,FGFR3,IL18,RHOQ,CCL2,RHOU,PIK3R6,TGFB2,ELK1,PLAT
33	Colorectal Cancer Metastasis Signaling	1.97E00	0.0107152	8.91E-02		-3.838	SRC,MMP15,TLR8,MMP2,PDGFC,PGF,FGFR3,ADCY9,FZD8,WNT7A,PRKAR2B,RHOQ,FZD4,TLR5,MMP8,RHOU,PIK3R6,TLR7,TGFB2,Tlr13,TLR3,EGFR
34	Integrin Signaling	1.95E00	0.0112202	9.13E-02		-3.900	ITGAD,SRC,PARVA,ITGB8,BCAR1,FGFR3,DOCK1,ITGAM,RHOQ,ACTA2,TSPAN1,ITGA9,PLCG2,GRB7,RHOU,PIK3R6,ITGB6,CTTN,ITGB5,ITGAX
35	Cell Cycle: G2/M DNA Damage Checkpoint Regulation	1.88E00	0.0131826	1.43E-01		1.134	CDC25C,CDKN1A,PLK1,AURKA,BRCA1,CDK1,CCNB1
36	FXR/RXR Activation	1.83E00	0.0147911	1.03E-01		NaN	KNG1,PPARG,IL1A,IL18,SDC1,CYP27A1,FOXA2,FETUB,LPL,SERPINF1,PCYOX1,VLDLR,CLU
37	Melatonin Degradation II	1.81E00	0.0154882	5E-01		NaN	MAOB,MAOA
38	Arginine Degradation I (Arginase Pathway)	1.81E00	0.0154882	5E-01		NaN	ARG2,ARG1
39	Bladder Cancer Signaling	1.81E00	0.0154882	1.15E-01		NaN	FGFR3,THBS1,MMP8,MMP15,CDKN1A,FGF11,MMP2,PDGFC,PGF,EGFR
40	GADD45 Signaling	1.81E00	0.0154882	2.11E-01		NaN	CDKN1A,BRCA1,CDK1,CCNB1
41	IL-8 Signaling	1.81E00	0.0154882	9.14E-02		-4.243	SRC,VCAM1,GNA12,GNAI1,HBEGF,MMP2,CXCR1,PDGFC,PLD1,PGF,FGFR3,RHOQ,ITGAM,RHOU,PIK3R6,ITGB5,EGFR,ITGAX
42	Intrinsic Prothrombin Activation Pathway	1.79E00	0.0162181	1.72E-01		0.000	COL1A2,KNG1,COL1A1,F10,PROS1
43	Sonic Hedgehog Signaling	1.73E00	0.0186209	1.67E-01		NaN	DYRK1B,PRKAR2B,GLIS2,CDK1,CCNB1
44	Antioxidant Action of Vitamin C	1.72E00	0.0190546	1.07E-01		3.162	PNPLA8,PLCD3,PLA2G4A,CSF2RB,PLCB4,ABHD3,PLCG2,PLA2G1B,MAPK13,PLD1,GSTO1
45	Altered T Cell and B Cell Signaling in Rheumatoid Arthritis	1.72E00	0.0190546	1.11E-01		NaN	IL1A,IL18,CD80,TLR5,TNFSF13,TLR7,TLR8,Tlr13,TLR3,TNFRSF13C
46	Thrombin Signaling	1.69E00	0.0204174	8.87E-02		-3.771	SRC,F2RL2,CAMK1,GNA12,GNAI1,MAPK13,FGFR3,ADCY9,PLCD3,PLCB4,RHOQ,ARHGEF16,PLCG2,RHOU,PIK3R6,GATA6,ELK1,EGFR
47	Role of Macrophages, Fibroblasts and Endothelial Cells in Rheumatoid Arthritis	1.68E00	0.020893	8.09E-02		NaN	SRC,IL1A,VCAM1,FN1,TLR8,PDGFC,PGF,C5,FGFR3,FZD8,PLCD3,IL18,PLCB4,FZD4,WNT7A,CCL2,TLR5,PLCG2,CEBPA,PIK3R6,TLR7,Tlr13,TLR3,FCGR3A/FCGR3B,RYK
48	Adipogenesis pathway	1.63E00	0.0234423	9.7E-02		NaN	PPARG,PPIP5K1,SAP30,FGFR3,FZD8,FZD4,DLK1,BMPR1A,KLF5,CTBP2,LPL,CEBPA,FGFRL1
49	Glioma Invasiveness Signaling	1.53E00	0.0295121	1.14E-01		-2.828	FGFR3,RHOQ,TIMP1,RHOU,PIK3R6,PLAUR,MMP2,ITGB5
50	Putrescine Degradation III	1.52E00	0.0301995	1.74E-01		NaN	ALDH2,MAOB,ALDH1L1,MAOA
51	Chemokine Signaling	1.5E00	0.0316228	1.13E-01		-2.828	SRC,PLCB4,CCR5,CAMK1,CCL2,PLCG2,GNAI1,MAPK13
52	MSP-RON Signaling Pathway	1.47E00	0.0338844	1.19E-01		NaN	FGFR3,CSF2RB,ITGAM,ACTA2,CCL2,PIK3R6,RPS6KA2
53	Dopamine Degradation	1.46E00	0.0346737	1.43E-01		NaN	ALDH2,MAOB,ALDH1L1,COMT,MAOA
54	Urea Cycle	1.45E00	0.0354813	3.33E-01		NaN	ARG2,ARG1
55	Arginine Degradation VI (Arginase 2 Pathway)	1.45E00	0.0354813	3.33E-01		NaN	ARG2,ARG1
56	Glycerol Degradation I	1.45E00	0.0354813	3.33E-01		NaN	GK5,GPD1
57	autophagy	1.44E00	0.0363078	1.17E-01		NaN	CTSD,ATG4C,CTSK,ULK1,CTSS,WIPI1,ATG9B
58	Neuropathic Pain Signaling In Dorsal Horn Neurons	1.43E00	0.0371535	9.65E-02		-3.317	FGFR3,PLCD3,SRC,PLCB4,KCNN3,CAMK1,PRKAR2B,PLCG2,GRIN2D,PIK3R6,ELK1
59	Endothelin-1 Signaling	1.43E00	0.0371535	8.56E-02		-3.500	PNPLA8,SRC,ABHD3,GNA12,PTGS1,GNAI1,PLA2G1B,MAPK13,PLD1,FGFR3,ADCY9,PLA2G4A,PLCD3,PLCB4,PLCG2,PIK3R6
60	Germ Cell-Sertoli Cell Junction Signaling	1.41E00	0.0389045	8.67E-02		NaN	SRC,BCAR1,PLS1,FGFR3,EPN2,RHOQ,ACTA2,SORBS1,FER,RHOU,PIK3R6,TGFB2,TUBA1C,TUBB4A,NECTIN2
61	Cholecystokinin/Gastrin-mediated Signaling	1.41E00	0.0389045	9.9E-02		-3.162	SRC,IL1A,PLCB4,IL18,RHOQ,GNA12,RHOU,ELK1,BCAR1,EGFR
62	Tryptophan Degradation X (Mammalian, via Tryptamine)	1.4E00	0.0398107	1.6E-01		NaN	ALDH2,MAOB,ALDH1L1,MAOA
63	Glioblastoma Multiforme Signaling	1.4E00	0.0398107	8.81E-02		-3.207	SRC,PDGFC,FGFR3,FZD8,PLCD3,PLCB4,RHOQ,FZD4,WNT7A,PLCG2,CDKN1A,RHOU,PIK3R6,EGFR
64	HER-2 Signaling in Breast Cancer	1.39E00	0.040738	1.02E-01		NaN	FGFR3,CDKN1A,PIK3R6,PARD6B,MMP2,ITGB8,ITGB6,ITGB5,EGFR
65	p70S6K Signaling	1.37E00	0.042658	9.16E-02		-2.887	FGFR3,PLCD3,SRC,PLCB4,F2RL2,PLCG2,SYK,PPM1L,PIK3R6,GNAI1,PLD1,EGFR
66	Complement System	1.37E00	0.042658	1.35E-01		NaN	C1R,ITGAM,CFB,C5,ITGAX
67	Gluconeogenesis I	1.35E00	0.0446684	1.54E-01		NaN	LIPF,ME1,FBP2,ALDOC
68	Pancreatic Adenocarcinoma Signaling	1.34E00	0.0457088	9.32E-02		-3.000	RAD51,FGFR3,CDKN1A,TGFB2,PIK3R6,HBEGF,ELK1,PDGFC,PLD1,PGF,EGFR
69	cAMP-mediated signaling	1.34E00	0.0457088	8.07E-02		-2.183	SRC,CAMK1,VIPR2,GNAI1,PDE4A,FPR2,RGS4,ADORA3,PDE8A,ADCY9,P2RY13,PRKAR2B,RAP1GAP,ADORA2B,SMPDL3B,PDE8B,AKAP1,PKIG
70	Dermatan Sulfate Degradation (Metazoa)	1.32E00	0.047863	1.88E-01		NaN	Chil3/Chil4,HYAL1,FGFRL1
71	Parkinson's Signaling	1.32E00	0.047863	1.88E-01		NaN	MAPK13,PARK2,SNCA
72	Ceramide Degradation	1.32E00	0.047863	2.86E-01		NaN	NAAA,ASAH2
73	Axonal Guidance Signaling	1.31E00	0.0489779	7.13E-02		NaN	ENPEP,BMP3,PLXNA2,BCAR1,PDGFC,PGF,FGFR3,PLCD3,WNT7A,SDC2,MMP8,ABLIM3,TUBB4A,TUBA1C,SEMA3B,SEMA3E,NRP2,ADAMTS1,GNA12,GNAI1,MMP2,MET,FZD8,DOCK1,PLCB4,KIF7,PRKAR2B,FZD4,GLIS2,PLCG2,PIK3R6,SEMA7A
74	D-myo-inositol (1,4,5)-Trisphosphate Biosynthesis	1.3E00	0.0501187	1.48E-01		NaN	PLCD3,PLCB4,PLCG2,PI4K2B
75	tRNA Splicing	1.29E00	0.0512861	1.28E-01		NaN	PDE8A,TSEN54,PDE4A,PDE8B,SMPDL3B
76	Clathrin-mediated Endocytosis Signaling	1.26E00	0.0549541	8.12E-02		NaN	SRC,PCYOX1,ITGB8,PDGFC,PGF,MET,FGFR3,LYZ,ACTA2,PIK3R6,FGF11,ITGB6,CTTN,CLU,ITGB5,HIP1R
77	Mitotic Roles of Polo-Like Kinase	1.25E00	0.0562341	1.06E-01		-2.449	CDC25C,PLK4,PPM1L,PLK1,CDK1,KIF11,CCNB1
78	ATM Signaling	1.24E00	0.057544	1E-01		-0.707	RAD51,CDC25C,FANCD2,CDKN1A,MAPK13,BRCA1,CDK1,CCNB1
79	Molecular Mechanisms of Cancer	1.24E00	0.057544	7.22E-02		NaN	Naip1 (includes others),BMP3,MAPK13,FGFR3,RASGRF1,WNT7A,FANCD2,BMPR1A,RHOU,TGFB2,BRCA1,SRC,CDC25C,GNA12,GNAI1,AURKA,BAK1,ADCY9,FZD8,PLCB4,RHOQ,PRKAR2B,FZD4,ARHGEF16,CDKN1A,PIK3R6,ELK1
80	Gustation Pathway	1.22E00	0.060256	8.87E-02		NaN	PDE8A,ADCY9,P2RY2,P2RY13,PRKAR2B,PKD1L3,ASIC3,PDE4A,PDE8B,SMPDL3B,SCNN1B
81	Salvage Pathways of Pyrimidine Ribonucleotides	1.22E00	0.060256	9.47E-02		NaN	CDK18,AK1,AK8,UPP1,PLK1,AK9,TTK,MAK,CDK1
82	Airway Pathology in Chronic Obstructive Pulmonary Disease	1.21E00	0.0616595	2.5E-01		NaN	MMP8,MMP2
83	Citrulline Biosynthesis	1.21E00	0.0616595	2.5E-01		NaN	ARG2,ARG1
84	Gap Junction Signaling	1.2E00	0.0630957	8.24E-02		NaN	SRC,GNAI1,FGFR3,ADCY9,PLCD3,PLCB4,PRKAR2B,NOV,ACTA2,PLCG2,PIK3R6,TUBB4A,TUBA1C,EGFR
85	IL-10 Signaling	1.19E00	0.0645654	1.03E-01		NaN	IL1A,IL18,CCR5,ARG2,LBP,MAPK13,ELK1
86	Role of CHK Proteins in Cell Cycle Checkpoint Control	1.17E00	0.0676083	1.09E-01		0.000	CDC25C,CDKN1A,PPM1L,PLK1,BRCA1,CDK1
87	TR/RXR Activation	1.15E00	0.0707946	9.18E-02		NaN	FGFR3,F10,UCP3,AKR1C3,SLC16A2,PIK3R6,ME1,THRB,THRSP
88	ErbB Signaling	1.15E00	0.0707946	9.18E-02		NaN	FGFR3,PLCG2,PIK3R6,NRG4,HBEGF,MAPK13,ELK1,EREG,EGFR
89	Human Embryonic Stem Cell Pluripotency	1.14E00	0.0724436	8.39E-02		NaN	FGFR3,FZD8,FZD4,WNT7A,BMPR1A,BMP3,ACVR1,SPHK1,TGFB2,PIK3R6,FGFRL1,PDGFC
90	Serotonin Receptor Signaling	1.14E00	0.0724436	1.16E-01		NaN	ADCY9,MAOB,SLC6A4,PCBD1,MAOA
91	DNA damage-induced 14-3-3Ïƒ Signaling	1.13E00	0.074131	1.58E-01		NaN	BRCA1,CDK1,CCNB1
92	Dendritic Cell Maturation	1.13E00	0.074131	7.89E-02		-3.207	IL1A,LEPR,MAPK13,FGFR3,COL1A2,COL1A1,PLCD3,PLCB4,IL18,CD80,PLCG2,PIK3R6,IRF8,TLR3,FCGR3A/FCGR3B
93	Leptin Signaling in Obesity	1.11E00	0.0776247	9.41E-02		NaN	FGFR3,PLCD3,ADCY9,PLCB4,PRKAR2B,LEPR,PLCG2,PIK3R6
94	Sphingosine and Sphingosine-1-phosphate Metabolism	1.11E00	0.0776247	2.22E-01		NaN	NAAA,ASAH2
95	Prostanoid Biosynthesis	1.11E00	0.0776247	2.22E-01		NaN	PTGES,PTGS1
96	Heme Biosynthesis II	1.11E00	0.0776247	2.22E-01		NaN	ALAS2,CPOX
97	Cellular Effects of Sildenafil (Viagra)	1.1E00	0.0794328	8.46E-02		NaN	PLCD3,ADCY9,PLCB4,KCNN3,PRKAR2B,ACTA2,PLCG2,PDE4A,CACNA1C,MYH7,MYH11
98	Virus Entry via Endocytic Pathways	1.06E00	0.0870964	8.82E-02		NaN	FGFR3,SRC,ACTA2,PLCG2,PIK3R6,ITGB8,ITGB6,CXADR,ITGB5
99	STAT3 Pathway	1.06E00	0.0870964	9.59E-02		-1.890	FGFR3,SRC,BMPR1A,CDKN1A,FGFRL1,MAPK13,EGFR
100	Neuregulin Signaling	1.05E00	0.0891251	9.09E-02		-2.828	SRC,PLCG2,GRB7,NRG4,HBEGF,ELK1,EREG,EGFR
101	Serotonin Degradation	1.04E00	0.0912011	9.46E-02		NaN	ALDH2,MAOB,ALDH1L1,DHRS9,Ugt1a7c,ADHFE1,MAOA
102	Maturity Onset Diabetes of Young (MODY) Signaling	1.02E00	0.0954993	1.43E-01		NaN	HNF1B,FOXA2,CACNA1C
103	Inflammasome pathway	1.02E00	0.0954993	1.43E-01		NaN	IL18,NLRP3,NLRP1
104	Inhibition of Angiogenesis by TSP1	9.99E-01	0.100231	1.18E-01		NaN	SDC1,THBS1,SDC2,MAPK13
105	UDP-D-xylose and UDP-D-glucuronate Biosynthesis	9.91E-01	0.102094	5E-01		NaN	UXS1
106	Epoxysqualene Biosynthesis	9.91E-01	0.102094	5E-01		NaN	SQLE
107	L-DOPA Degradation	9.91E-01	0.102094	5E-01		NaN	COMT
108	Glycine Degradation (Creatine Biosynthesis)	9.91E-01	0.102094	5E-01		NaN	GAMT
109	Fatty Acid Î±-oxidation	9.77E-01	0.105439	1.36E-01		NaN	ALDH2,ALDH1L1,ALOXE3
110	RhoA Signaling	9.71E-01	0.106905	8.2E-02		-0.707	RHPN2,ARHGAP6,ACTA2,NRP2,ANLN,GNA12,CIT,CDC42EP4,PLD1,ARHGAP8/PRR5-ARHGAP8
111	Dopamine Receptor Signaling	9.66E-01	0.108143	9.09E-02		NaN	ADCY9,MAOB,PRKAR2B,COMT,PPM1L,PCBD1,MAOA
112	VDR/RXR Activation	9.44E-01	0.113763	8.97E-02		NaN	CDKN1A,CEBPA,TGFB2,HES1,SEMA3B,HR,S100G
113	Differential Regulation of Cytokine Production in Intestinal Epithelial Cells by IL-17A and IL-17F	9.33E-01	0.116681	1.3E-01		NaN	IL1A,CCL2,LCN2
114	Pyrimidine Deoxyribonucleotides De Novo Biosynthesis I	9.33E-01	0.116681	1.3E-01		NaN	AK1,AK8,AK9
115	Sperm Motility	9.2E-01	0.120226	8E-02		-3.162	PNPLA8,PLCD3,PLA2G4A,PLCB4,PRKAR2B,ABHD3,PLCG2,PLA2G1B,PDE4A,FRK
116	Melanocyte Development and Pigmentation Signaling	9.04E-01	0.124738	8.42E-02		-2.646	FGFR3,ADCY9,SRC,PRKAR2B,PLCG2,SH2B2,PIK3R6,RPS6KA2
117	Ethanol Degradation II	8.97E-01	0.126765	1.08E-01		NaN	ALDH2,ALDH1L1,DHRS9,ADHFE1
118	p53 Signaling	8.93E-01	0.127938	8.11E-02		-1.000	FGFR3,THBS1,CDKN1A,PIK3R6,PERP,TRIM29,BRCA1,SERPINE2,DRAM1
119	Growth Hormone Signaling	8.81E-01	0.131522	8.64E-02		-2.646	FGFR3,PLCG2,CSHL1,CEBPA,PIK3R6,RPS6KA2,ELK1
120	Superpathway of Melatonin Degradation	8.6E-01	0.138038	8.96E-02		NaN	MAOB,Ugt1a7c,CYP2A6 (includes others),CYP2J2,CYP51A1,MAOA
121	Bupropion Degradation	8.52E-01	0.140605	1.2E-01		NaN	CYP2A6 (includes others),CYP2J2,CYP51A1
122	Synaptic Long Term Depression	8.41E-01	0.144212	7.53E-02		-2.714	PNPLA8,PLCD3,PLA2G4A,PLCB4,ABHD3,PLCG2,GNA12,PPM1L,PLA2G1B,GNAI1,RYR1
123	14-3-3-mediated Signaling	8.4E-01	0.144544	7.69E-02		-1.890	FGFR3,PLCD3,SRC,PLCB4,PLCG2,PIK3R6,TUBA1C,TUBB4A,ELK1,SNCA
124	EGF Signaling	8.38E-01	0.145211	8.82E-02		-2.449	FGFR3,SRC,PIK3R6,MAPK13,ELK1,EGFR
125	Estrogen Biosynthesis	8.37E-01	0.145546	1.03E-01		NaN	AKR1C3,CYP2A6 (includes others),CYP2J2,CYP51A1
126	Oleate Biosynthesis II (Animals)	8.35E-01	0.146218	1.54E-01		NaN	SCD,FADS6
127	Cholesterol Biosynthesis I	8.35E-01	0.146218	1.54E-01		NaN	SQLE,CYP51A1
128	Bile Acid Biosynthesis, Neutral Pathway	8.35E-01	0.146218	1.54E-01		NaN	CYP27A1,AKR1C3
129	Cholesterol Biosynthesis II (via 24,25-dihydrolanosterol)	8.35E-01	0.146218	1.54E-01		NaN	SQLE,CYP51A1
130	Cholesterol Biosynthesis III (via Desmosterol)	8.35E-01	0.146218	1.54E-01		NaN	SQLE,CYP51A1
131	FAK Signaling	8.31E-01	0.147571	8.08E-02		NaN	FGFR3,DOCK1,SRC,ACTA2,PLCG2,PIK3R6,BCAR1,EGFR
132	D-glucuronate Degradation I	8.27E-01	0.148936	3.33E-01		NaN	DCXR
133	Thyroid Hormone Biosynthesis	8.27E-01	0.148936	3.33E-01		NaN	CTSD
134	S-adenosyl-L-methionine Biosynthesis	8.27E-01	0.148936	3.33E-01		NaN	MAT1A
135	Tyrosine Biosynthesis IV	8.27E-01	0.148936	3.33E-01		NaN	PCBD1
136	PEDF Signaling	8.22E-01	0.150661	8.33E-02		-2.646	PPARG,FGFR3,HNF1B,SERPINF1,PIK3R6,MAPK13,ELK1
137	NF-ÎºB Signaling	8.21E-01	0.151008	7.22E-02		-3.051	IL1A,TLR8,FGFR3,IL18,TLR5,BMPR1A,PLCG2,PIK3R6,TLR7,FGFRL1,TLR3,TIRAP,EGFR
138	Nicotine Degradation III	8.2E-01	0.151356	9.26E-02		NaN	Ugt1a7c,CYP2A6 (includes others),CYP2J2,CYP51A1,Aox3
139	Agrin Interactions at Neuromuscular Junction	8.17E-01	0.152405	8.7E-02		-1.342	SRC,ACTA2,NRG4,DAG1,CTTN,EGFR
140	Retinol Biosynthesis	8.08E-01	0.155597	1E-01		NaN	DHRS9,AKR1C3,LIPF,LPL
141	GPCR-Mediated Nutrient Sensing in Enteroendocrine Cells	8.04E-01	0.157036	8.24E-02		NaN	PLCD3,ADCY9,PLCB4,PRKAR2B,FFAR4,PLCG2,GNAI1
142	CXCR4 Signaling	8.03E-01	0.157398	7.27E-02		-2.714	FGFR3,ADCY9,DOCK1,SRC,PLCB4,RHOQ,GNA12,RHOU,PIK3R6,GNAI1,ELK1,BCAR1
143	DNA Double-Strand Break Repair by Homologous Recombination	7.83E-01	0.164816	1.43E-01		NaN	RAD51,BRCA1
144	Superpathway of Citrulline Metabolism	7.83E-01	0.164816	1.43E-01		NaN	ARG2,ARG1
145	UVA-Induced MAPK Signaling	7.81E-01	0.165577	7.84E-02		-2.828	FGFR3,PLCD3,PLCB4,PLCG2,PIK3R6,MAPK13,RPS6KA2,EGFR
146	Acetone Degradation I (to Methylglyoxal)	7.8E-01	0.165959	1.11E-01		NaN	CYP2A6 (includes others),CYP2J2,CYP51A1
147	HIPPO signaling	7.67E-01	0.171002	8.05E-02		2.000	DLG5,AJUBA,WWC1,FAT4,RASSF6,WWTR1,PPM1L
148	Relaxin Signaling	7.59E-01	0.174181	7.24E-02		-2.236	PDE8A,FGFR3,ADCY9,PRKAR2B,GNA12,PDE4A,PIK3R6,GNAI1,PDE8B,SMPDL3B,ELK1
149	Basal Cell Carcinoma Signaling	7.57E-01	0.174985	8.33E-02		-1.342	FZD8,FZD4,WNT7A,KIF7,GLIS2,BMP3
150	Role of MAPK Signaling in the Pathogenesis of Influenza	7.57E-01	0.174985	8.33E-02		NaN	PNPLA8,PLA2G4A,CCL2,ABHD3,PLA2G1B,MAPK13
151	GPCR-Mediated Integration of Enteroendocrine Signaling Exemplified by an L Cell	7.57E-01	0.174985	8.33E-02		NaN	PLCD3,ADCY9,PLCB4,PRKAR2B,PLCG2,GNAI1
152	Acute Phase Response Signaling	7.53E-01	0.176604	7.1E-02		-2.646	C1R,IL1A,IL18,FN1,Saa3,SERPINF1,CFB,LBP,MAPK13,ELK1,SERPIND1,C5
153	Wnt/Ca+ pathway	7.51E-01	0.177419	8.77E-02		-2.236	PLCD3,FZD8,PLCB4,FZD4,PLCG2
154	G Beta Gamma Signaling	7.5E-01	0.177828	7.95E-02		-2.646	SRC,PRKAR2B,PLCG2,GNA12,GNAI1,HBEGF,EGFR
155	VEGF Family Ligand-Receptor Interactions	7.5E-01	0.177828	7.95E-02		-2.449	FGFR3,PLA2G4A,NRP2,PLCG2,PLA2G1B,PIK3R6,PGF
156	GÎ±i Signaling	7.5E-01	0.177828	7.5E-02		-0.333	ADCY9,P2RY13,SRC,PRKAR2B,RAP1GAP,FPR2,GNAI1,RGS4,ADORA3
157	Tec Kinase Signaling	7.41E-01	0.181552	7.06E-02		-2.530	TNFRSF21,FGFR3,SRC,RHOQ,ACTA2,PLCG2,GNA12,RHOU,PIK3R6,GNAI1,BMX,FRK
158	Cardiac Î²-adrenergic Signaling	7.4E-01	0.18197	7.3E-02		-1.667	PDE8A,ADCY9,PRKAR2B,PPM1L,PDE4A,CACNA1C,PDE8B,SMPDL3B,AKAP1,PKIG
159	nNOS Signaling in Skeletal Muscle Cells	7.36E-01	0.183654	1.33E-01		NaN	RYR1,DAG1
160	Chondroitin Sulfate Degradation (Metazoa)	7.36E-01	0.183654	1.33E-01		NaN	Chil3/Chil4,HYAL1
161	Glutaryl-CoA Degradation	7.36E-01	0.183654	1.33E-01		NaN	L3HYPDH,HACD1
162	G-Protein Coupled Receptor Signaling	7.35E-01	0.184077	6.62E-02		NaN	SRC,VIPR2,GNAI1,PDE4A,FPR2,RGS4,ADORA3,FGFR3,PDE8A,ADCY9,P2RY13,PLCB4,PRKAR2B,RAP1GAP,PIK3R6,PDE8B,SMPDL3B,ADORA2B
163	Crosstalk between Dendritic Cells and Natural Killer Cells	7.33E-01	0.184927	7.87E-02		NaN	CSF2RB,IL18,ACTA2,CD80,TLR7,TLR3,NECTIN2
164	Role of Hypercytokinemia/hyperchemokinemia in the Pathogenesis of Influenza	7.29E-01	0.186638	9.3E-02		NaN	IL1A,IL18,CCR5,CCL2
165	Pyrimidine Ribonucleotides Interconversion	7.29E-01	0.186638	9.3E-02		NaN	AK1,AK8,RAD54L,AK9
166	Role of NANOG in Mammalian Embryonic Stem Cell Pluripotency	7.21E-01	0.190108	7.38E-02		NaN	FGFR3,FZD8,FZD4,LIF,WNT7A,BMPR1A,BMP3,PIK3R6,GATA6
167	Mouse Embryonic Stem Cell Pluripotency	7.18E-01	0.191426	7.55E-02		-2.121	FGFR3,FZD8,ID1,FZD4,LIF,BMPR1A,PIK3R6,MAPK13
168	PDGF Signaling	7.16E-01	0.192309	7.78E-02		-2.646	FGFR3,SRC,PLCG2,SPHK1,PIK3R6,ELK1,PDGFC
169	Airway Inflammation in Asthma	7.13E-01	0.193642	2.5E-01		NaN	IL5
170	Arsenate Detoxification I (Glutaredoxin)	7.13E-01	0.193642	2.5E-01		NaN	GSTO1
171	Uracil Degradation II (Reductive)	7.13E-01	0.193642	2.5E-01		NaN	DPYS
172	Heme Biosynthesis from Uroporphyrinogen-III I	7.13E-01	0.193642	2.5E-01		NaN	CPOX
173	Phenylethylamine Degradation I	7.13E-01	0.193642	2.5E-01		NaN	ALDH2
174	Ascorbate Recycling (Cytosolic)	7.13E-01	0.193642	2.5E-01		NaN	GSTO1
175	Thymine Degradation	7.13E-01	0.193642	2.5E-01		NaN	DPYS
176	Glycerol-3-phosphate Shuttle	7.13E-01	0.193642	2.5E-01		NaN	GPD1
177	Phenylalanine Degradation I (Aerobic)	7.13E-01	0.193642	2.5E-01		NaN	PCBD1
178	Glutathione-mediated Detoxification	6.86E-01	0.206063	1E-01		NaN	Gstt3,ANPEP,GSTO1
179	Reelin Signaling in Neurons	6.84E-01	0.207014	7.61E-02		NaN	FGFR3,SRC,ARHGEF16,PIK3R6,LRP8,VLDLR,FRK
180	Factors Promoting Cardiogenesis in Vertebrates	6.84E-01	0.207014	7.61E-02		NaN	FZD8,FZD4,BMPR1A,BMP3,ACVR1,TGFB2,MYH7
181	Role of NFAT in Cardiac Hypertrophy	6.82E-01	0.20797	6.77E-02		NaN	SRC,LIF,CAMK1,GNAI1,MAPK13,FGFR3,ADCY9,PLCD3,PLCB4,PRKAR2B,PLCG2,PIK3R6,TGFB2
182	Pyrimidine Ribonucleotides De Novo Biosynthesis	6.81E-01	0.208449	8.89E-02		NaN	AK1,AK8,RAD54L,AK9
183	Hereditary Breast Cancer Signaling	6.75E-01	0.211349	7.04E-02		NaN	RAD51,FGFR3,CDC25C,FANCD2,BARD1,CDKN1A,PIK3R6,BRCA1,CDK1,CCNB1
184	Hepatic Cholestasis	6.73E-01	0.212324	6.92E-02		NaN	ADCY9,IL1A,IL18,LIF,PRKAR2B,CYP27A1,IL5,TGFB2,LBP,ABCC3,TIRAP
185	Actin Cytoskeleton Signaling	6.64E-01	0.21677	6.58E-02		-1.667	KNG1,FN1,GNA12,MYH7,MYH11,BCAR1,PDGFC,FGFR3,DOCK1,ACTA2,PIK3R6,FGF11,LBP,ARHGAP24,NCKAP1
186	Glioma Signaling	6.59E-01	0.21928	7.27E-02		-1.890	FGFR3,CAMK1,PLCG2,CDKN1A,PIK3R6,PDGFC,IDH1,EGFR
187	Role of BRCA1 in DNA Damage Response	6.49E-01	0.224388	7.69E-02		-2.236	RAD51,FANCD2,BARD1,CDKN1A,PLK1,BRCA1
188	ERK5 Signaling	6.31E-01	0.233884	7.94E-02		-2.236	SRC,LIF,GNA12,RPS6KA2,EGFR
189	Nicotine Degradation II	6.31E-01	0.233884	7.94E-02		NaN	Ugt1a7c,CYP2A6 (includes others),CYP2J2,CYP51A1,Aox3
190	PCP pathway	6.31E-01	0.233884	7.94E-02		NaN	FZD8,SDC1,FZD4,WNT7A,SDC2
191	IL-12 Signaling and Production in Macrophages	6.27E-01	0.236048	6.85E-02		NaN	PPARG,FGFR3,IL18,LYZ,TGFB2,PIK3R6,PCYOX1,MAPK13,IRF8,CLU
192	Trehalose Degradation II (Trehalase)	6.27E-01	0.236048	2E-01		NaN	HK2
193	Creatine-phosphate Biosynthesis	6.27E-01	0.236048	2E-01		NaN	CKMT1A/CKMT1B
194	Tetrahydrofolate Salvage from 5,10-methenyltetrahydrofolate	6.27E-01	0.236048	2E-01		NaN	MTHFD2L
195	Tetrapyrrole Biosynthesis II	6.27E-01	0.236048	2E-01		NaN	ALAS2
196	Nitric Oxide Signaling in the Cardiovascular System	6.19E-01	0.240436	7.08E-02		-2.646	KNG1,FGFR3,PRKAR2B,PIK3R6,CACNA1C,ARG2,PDGFC,PGF
197	ERK/MAPK Signaling	6.11E-01	0.244906	6.53E-02		-2.496	PPARG,SRC,PLA2G1B,BCAR1,FGFR3,PLA2G4A,DOCK1,PRKAR2B,ELF3,PLCG2,PPM1L,PIK3R6,ELK1
198	Superpathway of Inositol Phosphate Compounds	6.08E-01	0.246604	6.41E-02		NaN	MET,FGFR3,PLCD3,CDC25C,PLCB4,CD80,PLCG2,DUSP13,NUDT12,PIK3R6,PPIP5K1,PIK3AP1,PI4K2B,DUSP14,EGFR
199	Cardiac Hypertrophy Signaling	6E-01	0.251189	6.38E-02		-3.207	GNA12,GNAI1,CACNA1C,MAPK13,FGFR3,ADCY9,PLCD3,PLCB4,PRKAR2B,RHOQ,PLCG2,RHOU,PIK3R6,TGFB2,ELK1
200	Pyridoxal 5'-phosphate Salvage Pathway	5.96E-01	0.253513	7.69E-02		NaN	CDK18,PLK1,TTK,MAK,CDK1
201	HIF1Î± Signaling	5.93E-01	0.25527	6.96E-02		NaN	FGFR3,MMP8,MMP15,PIK3R6,MMP2,MAPK13,PDGFC,PGF
202	HGF Signaling	5.93E-01	0.25527	6.96E-02		-1.890	MET,FGFR3,DOCK1,ELF3,PLCG2,CDKN1A,PIK3R6,ELK1
203	P2Y Purigenic Receptor Signaling Pathway	5.93E-01	0.25527	6.82E-02		-2.333	FGFR3,PLCD3,ADCY9,P2RY2,PLCB4,PRKAR2B,PLCG2,PIK3R6,GNAI1
204	Histamine Degradation	5.81E-01	0.262422	1.05E-01		NaN	ALDH2,ALDH1L1
205	Breast Cancer Regulation by Stathmin1	5.73E-01	0.267301	6.4E-02		NaN	FGFR3,ADCY9,PLCB4,CAMK1,PRKAR2B,ARHGEF16,CDKN1A,PPM1L,PIK3R6,GNAI1,TUBB4A,TUBA1C,CDK1
206	p38 MAPK Signaling	5.68E-01	0.270396	6.84E-02		-2.646	PLA2G4A,IL1A,IL18,TGFB2,PLA2G1B,MAPK13,RPS6KA2,ELK1
207	Pentose Phosphate Pathway (Non-oxidative Branch)	5.59E-01	0.276058	1.67E-01		NaN	TKTL1
208	Glycine Cleavage Complex	5.59E-01	0.276058	1.67E-01		NaN	AMT
209	Zymosterol Biosynthesis	5.59E-01	0.276058	1.67E-01		NaN	CYP51A1
210	Glycogen Biosynthesis II (from UDP-D-Glucose)	5.59E-01	0.276058	1.67E-01		NaN	GYS1
211	IL-17A Signaling in Fibroblasts	5.58E-01	0.276694	8.57E-02		NaN	CCL2,LCN2,MAPK13
212	Cardiomyocyte Differentiation via BMP Receptors	5.49E-01	0.282488	1E-01		NaN	BMPR1A,MYH7
213	The Visual Cycle	5.49E-01	0.282488	1E-01		NaN	DHRS9,AKR1C3
214	Fc Epsilon RI Signaling	5.45E-01	0.285102	6.72E-02		-2.646	FGFR3,PLA2G4A,IL5,PLCG2,SYK,PLA2G1B,PIK3R6,MAPK13
215	IL-17 Signaling	5.43E-01	0.286418	7.06E-02		NaN	FGFR3,CCL2,TIMP1,PIK3R6,MAPK13,ELK1
216	AMPK Signaling	5.41E-01	0.28774	6.35E-02		-1.890	FGFR3,SRC,AK1,ULK1,PRKAR2B,GYS1,PFKFB1,AK8,CDKN1A,PPM1L,PIK3R6,MAPK13
217	Regulation of the Epithelial-Mesenchymal Transition Pathway	5.41E-01	0.28774	6.35E-02		NaN	MET,FGFR3,FZD8,FZD4,WNT7A,TGFB2,PIK3R6,PARD6B,FGF11,MMP2,FGFRL1,EGFR
218	Renin-Angiotensin Signaling	5.33E-01	0.293089	6.67E-02		-2.828	FGFR3,ADCY9,PRKAR2B,CCL2,PLCG2,PIK3R6,MAPK13,ELK1
219	Remodeling of Epithelial Adherens Junctions	5.31E-01	0.294442	7.25E-02		NaN	MET,SRC,ACTA2,TUBA1C,TUBB4A
220	VEGF Signaling	5.31E-01	0.294442	6.8E-02		-1.890	FGFR3,SRC,ACTA2,PLCG2,PIK3R6,PDGFC,PGF
221	FcÎ³RIIB Signaling in B Lymphocytes	5.21E-01	0.301301	7.55E-02		-2.000	FGFR3,PLCG2,SYK,PIK3R6
222	Semaphorin Signaling in Neurons	5.21E-01	0.301301	7.55E-02		NaN	MET,RHOQ,RHOU,SEMA7A
223	Oxidative Ethanol Degradation III	5.2E-01	0.301995	9.52E-02		NaN	ALDH2,ALDH1L1
224	Production of Nitric Oxide and Reactive Oxygen Species in Macrophages	5.05E-01	0.312608	6.22E-02		-2.309	FGFR3,LYZ,RHOQ,PLCG2,PPM1L,RHOU,PIK3R6,ARG2,PCYOX1,MAPK13,IRF8,CLU
225	Aryl Hydrocarbon Receptor Signaling	5.05E-01	0.312608	6.43E-02		NaN	TGM2,CTSD,SRC,IL1A,ALDH1L1,NQO1,CDKN1A,TGFB2,GSTO1
226	NAD Salvage Pathway III	5.03E-01	0.314051	1.43E-01		NaN	NMRK1
227	Aspartate Degradation II	5.03E-01	0.314051	1.43E-01		NaN	LIPF
228	Melatonin Signaling	5.02E-01	0.314775	7.04E-02		-2.236	PLCD3,PLCB4,PRKAR2B,PLCG2,GNAI1
229	April Mediated Signaling	4.94E-01	0.320627	7.89E-02		NaN	TNFSF13,MAPK13,ELK1
230	Polyamine Regulation in Colon Cancer	4.93E-01	0.321366	9.09E-02		NaN	PPARG,PSMA8
231	GÎ±q Signaling	4.83E-01	0.328852	6.25E-02		-1.897	FGFR3,PLCB4,RHOQ,GYS1,PLCG2,RHOU,PIK3R6,RGS4,ELK1,PLD1
232	PPARÎ±/RXRÎ± Activation	4.81E-01	0.33037	6.18E-02		0.000	PLCD3,ADCY9,PLCB4,CHD5,GPD1,PRKAR2B,PLCG2,LPL,ACVR1,TGFB2,ITGB5
233	Role of Osteoblasts, Osteoclasts and Chondrocytes in Rheumatoid Arthritis	4.79E-01	0.331894	6.03E-02		NaN	SRC,CTSK,Naip1 (includes others),IL1A,BMP3,FGFR3,COL1A1,FZD8,IL18,FZD4,WNT7A,BMPR1A,MMP8,PIK3R6
234	FGF Signaling	4.78E-01	0.33266	6.67E-02		-2.449	MET,FGFR3,PIK3R6,FGF11,FGFRL1,MAPK13
235	Netrin Signaling	4.75E-01	0.334965	7.69E-02		NaN	PRKAR2B,ABLIM3,RYR1
236	IL-1 Signaling	4.66E-01	0.341979	6.59E-02		-2.449	ADCY9,IL1A,PRKAR2B,GNA12,GNAI1,MAPK13
237	Dopamine-DARPP32 Feedback in cAMP Signaling	4.65E-01	0.342768	6.17E-02		-1.897	PLCD3,ADCY9,PLCB4,PRKAR2B,PLCG2,KCNJ15,GRIN2D,PPM1L,GNAI1,CACNA1C
238	GÎ±s Signaling	4.61E-01	0.345939	6.42E-02		-2.646	ADCY9,SRC,PRKAR2B,VIPR2,RYR1,ADORA2B,ELK1
239	IL-6 Signaling	4.58E-01	0.348337	6.3E-02		-1.890	FGFR3,COL1A1,IL1A,IL18,PIK3R6,LBP,MAPK13,ELK1
240	B Cell Activating Factor Signaling	4.56E-01	0.349945	7.5E-02		NaN	MAPK13,ELK1,TNFRSF13C
241	Histidine Degradation III	4.56E-01	0.349945	1.25E-01		NaN	MTHFD2L
242	Inositol Pyrophosphates Biosynthesis	4.56E-01	0.349945	1.25E-01		NaN	PPIP5K1
243	Superoxide Radicals Degradation	4.56E-01	0.349945	1.25E-01		NaN	NQO1
244	Sphingomyelin Metabolism	4.56E-01	0.349945	1.25E-01		NaN	SGMS2
245	3-phosphoinositide Biosynthesis	4.56E-01	0.349945	6.03E-02		NaN	MET,FGFR3,CDC25C,CD80,DUSP13,NUDT12,PIK3R6,PPIP5K1,PIK3AP1,PI4K2B,DUSP14,EGFR
246	PI3K Signaling in B Lymphocytes	4.48E-01	0.356451	6.25E-02		-1.890	PLCD3,PLCB4,ATF5,PLCG2,SYK,SH2B2,PIK3AP1,ELK1
247	Antiproliferative Role of Somatostatin Receptor 2	4.48E-01	0.356451	6.67E-02		-1.342	FGFR3,SRC,CDKN1A,PIK3R6,ELK1
248	Estrogen-mediated S-phase Entry	4.43E-01	0.360579	8.33E-02		NaN	CDKN1A,CDK1
249	Tryptophan Degradation III (Eukaryotic)	4.43E-01	0.360579	8.33E-02		NaN	L3HYPDH,HACD1
250	FcÎ³ Receptor-mediated Phagocytosis in Macrophages and Monocytes	4.43E-01	0.360579	6.45E-02		-1.633	DOCK1,SRC,ACTA2,SYK,FCGR3A/FCGR3B,PLD1
251	Amyotrophic Lateral Sclerosis Signaling	4.4E-01	0.363078	6.31E-02		NaN	FGFR3,Naip1 (includes others),GRIN2D,PIK3R6,CACNA1C,PDGFC,PGF
252	GNRH Signaling	4.39E-01	0.363915	6.2E-02		-2.828	ADCY9,SRC,PLCB4,PRKAR2B,GNAI1,MAPK13,ELK1,EGFR
253	IL-15 Signaling	4.35E-01	0.367282	6.58E-02		NaN	FGFR3,VCAM1,SYK,PIK3R6,MAPK13
254	CREB Signaling in Neurons	4.31E-01	0.370681	5.98E-02		-3.162	FGFR3,PLCD3,ADCY9,PLCB4,PRKAR2B,PLCG2,GRIN2D,GNA12,PIK3R6,GNAI1,ELK1
255	Estrogen-Dependent Breast Cancer Signaling	4.23E-01	0.377572	6.49E-02		-2.236	FGFR3,SRC,PIK3R6,ELK1,EGFR
256	UVC-Induced MAPK Signaling	4.22E-01	0.378443	7.14E-02		NaN	SRC,MAPK13,EGFR
257	IL-17A Signaling in Gastric Cells	4.21E-01	0.379315	8E-02		NaN	MAPK13,EGFR
258	Ethanol Degradation IV	4.21E-01	0.379315	8E-02		NaN	ALDH2,ALDH1L1
259	Pathogenesis of Multiple Sclerosis	4.16E-01	0.383707	1.11E-01		NaN	CCR5
260	Sucrose Degradation V (Mammalian)	4.16E-01	0.383707	1.11E-01		NaN	ALDOC
261	Leucine Degradation I	4.16E-01	0.383707	1.11E-01		NaN	BCAT1
262	GDP-glucose Biosynthesis	4.16E-01	0.383707	1.11E-01		NaN	HK2
263	Folate Transformations I	4.16E-01	0.383707	1.11E-01		NaN	MTHFD2L
264	Cyclins and Cell Cycle Regulation	4.11E-01	0.38815	6.41E-02		0.447	CDKN1A,PPM1L,TGFB2,CDK1,CCNB1
265	NAD Salvage Pathway II	4E-01	0.398107	7.69E-02		NaN	NMRK1,NUDT12
266	Glycolysis I	4E-01	0.398107	7.69E-02		NaN	FBP2,ALDOC
267	Erythropoietin Signaling	3.99E-01	0.399025	6.33E-02		NaN	FGFR3,SRC,PLCG2,PIK3R6,ELK1
268	Melatonin Degradation I	3.88E-01	0.409261	6.45E-02		NaN	Ugt1a7c,CYP2A6 (includes others),CYP2J2,CYP51A1
269	Glucose and Glucose-1-phosphate Degradation	3.81E-01	0.415911	1E-01		NaN	HK2
270	Pentose Phosphate Pathway	3.81E-01	0.415911	1E-01		NaN	TKTL1
271	Pregnenolone Biosynthesis	3.81E-01	0.415911	1E-01		NaN	MICAL2
272	PTEN Signaling	3.64E-01	0.432514	5.88E-02		1.890	FGFR3,MAGI1,BMPR1A,CDKN1A,FGFRL1,BCAR1,EGFR
273	IL-2 Signaling	3.63E-01	0.433511	6.25E-02		-2.000	FGFR3,SYK,PIK3R6,ELK1
274	Superpathway of Cholesterol Biosynthesis	3.61E-01	0.435512	7.14E-02		NaN	SQLE,CYP51A1
275	Role of Oct4 in Mammalian Embryonic Stem Cell Pluripotency	3.61E-01	0.435512	6.52E-02		NaN	FOXA2,NR2F6,BRCA1
276	PXR/RXR Activation	3.51E-01	0.445656	6.15E-02		NaN	SCD,PRKAR2B,CYP2A6 (includes others),ABCC3
277	Purine Nucleotides De Novo Biosynthesis II	3.5E-01	0.446684	9.09E-02		NaN	ADSSL1
278	UDP-N-acetyl-D-galactosamine Biosynthesis II	3.5E-01	0.446684	9.09E-02		NaN	HK2
279	Autoimmune Thyroid Disease Signaling	3.47E-01	0.44978	6.38E-02		NaN	IL5,CD80,TG
280	Hematopoiesis from Pluripotent Stem Cells	3.47E-01	0.44978	6.38E-02		NaN	IL1A,LIF,IL5
281	Calcium Signaling	3.41E-01	0.456037	5.62E-02		-2.236	CAMK1,PRKAR2B,ACTA2,GRIN2D,RYR1,MYH7,ASPH,MYH11,PNCK,Tpm2
282	UVB-Induced MAPK Signaling	3.4E-01	0.457088	6.06E-02		NaN	FGFR3,PIK3R6,MAPK13,EGFR
283	Natural Killer Cell Signaling	3.39E-01	0.458142	5.74E-02		NaN	FGFR3,PLCG2,SYK,PIK3R6,Klra7 (includes others),SH3BP2,FCGR3A/FCGR3B
284	Insulin Receptor Signaling	3.37E-01	0.460257	5.67E-02		-2.121	FGFR3,RHOQ,PRKAR2B,GYS1,ASIC3,SH2B2,PIK3R6,SCNN1B
285	FLT3 Signaling in Hematopoietic Progenitor Cells	3.36E-01	0.461318	5.88E-02		-2.236	FGFR3,PIK3R6,MAPK13,RPS6KA2,ELK1
286	Graft-versus-Host Disease Signaling	3.34E-01	0.463447	6.25E-02		NaN	IL1A,IL18,CD80
287	Chronic Myeloid Leukemia Signaling	3.33E-01	0.464515	5.77E-02		NaN	FGFR3,MECOM,CDKN1A,CTBP2,TGFB2,PIK3R6
288	Role of IL-17A in Arthritis	3.29E-01	0.468813	5.97E-02		NaN	FGFR3,CCL2,PIK3R6,MAPK13
289	mTOR Signaling	3.26E-01	0.472063	5.53E-02		-1.414	FGFR3,ULK1,RHOQ,PPM1L,RHOU,PIK3R6,RPS6KA2,PDGFC,PLD1,PGF,ARHGAP8/PRR5-ARHGAP8
290	LPS-stimulated MAPK Signaling	3.26E-01	0.472063	5.81E-02		-2.000	FGFR3,PIK3R6,LBP,MAPK13,ELK1
291	Hematopoiesis from Multipotent Stem Cells	3.23E-01	0.475335	8.33E-02		NaN	IL5
292	BER pathway	3.23E-01	0.475335	8.33E-02		NaN	POLE
293	Î±-Adrenergic Signaling	3.17E-01	0.481948	5.75E-02		-1.000	ADCY9,PRKAR2B,GYS1,PLCG2,GNAI1
294	TGF-Î² Signaling	3.17E-01	0.481948	5.75E-02		-2.000	ZFYVE9,BMPR1A,ACVR1,TGFB2,MAPK13
295	IGF-1 Signaling	3.16E-01	0.483059	5.66E-02		-2.000	FGFR3,NOV,PRKAR2B,PIK3R6,ELK1,CYR61
296	Protein Kinase A Signaling	3.1E-01	0.489779	5.36E-02		-0.894	CDC25C,GNAI1,PDE4A,PTPN3,CDKN3,PDE8A,ADCY9,EPM2A,PLCD3,PLCB4,GYS1,DUSP3,PRKAR2B,PLCG2,TGFB2,RYR1,DUSP18,PDE8B,SMPDL3B,ELK1,AKAP1
297	Phospholipase C Signaling	3.09E-01	0.490908	5.42E-02		-2.111	SRC,PLA2G1B,PLD1,TGM2,ADCY9,PLCD3,PLA2G4A,PLCB4,RHOQ,PLCG2,SYK,ARHGEF16,RHOU
298	CCR5 Signaling in Macrophages	3.08E-01	0.49204	5.8E-02		NaN	CCR5,PLCG2,GNAI1,MAPK13
299	ErbB2-ErbB3 Signaling	3.08E-01	0.49204	5.8E-02		-2.000	FGFR3,PIK3R6,NRG4,ELK1
300	Apoptosis Signaling	2.99E-01	0.502343	5.62E-02		-0.447	GAS2,Naip1 (includes others),PLCG2,CDK1,BAK1
301	Histidine Degradation VI	2.98E-01	0.503501	7.69E-02		NaN	MICAL2
302	G Protein Signaling Mediated by Tubby	2.97E-01	0.504661	6.25E-02		NaN	PLCB4,PLCG2
303	Aldosterone Signaling in Epithelial Cells	2.95E-01	0.506991	5.42E-02		-2.646	FGFR3,PLCD3,PLCB4,PLCG2,ASIC3,HSPB8,PIK3R6,SCNN1B,HSPA12A
304	Role of JAK1 and JAK3 in Î³c Cytokine Signaling	2.89E-01	0.514044	5.63E-02		NaN	FGFR3,SYK,SH2B2,PIK3R6
305	Systemic Lupus Erythematosus Signaling	2.87E-01	0.516416	5.33E-02		NaN	KNG1,FGFR3,IL1A,IL18,CD80,PLCG2,CD22,TLR7,PIK3R6,TNFRSF13C,FCGR3A/FCGR3B,C5
306	Docosahexaenoic Acid (DHA) Signaling	2.86E-01	0.517607	5.77E-02		NaN	FGFR3,SERPINF1,PIK3R6
307	Acute Myeloid Leukemia Signaling	2.83E-01	0.521195	5.49E-02		0.000	FGFR3,CSF2RB,CEBPA,PIK3R6,IDH1
308	Circadian Rhythm Signaling	2.83E-01	0.521195	6.06E-02		NaN	VIPR2,GRIN2D
309	MIF-mediated Glucocorticoid Regulation	2.83E-01	0.521195	6.06E-02		NaN	PLA2G4A,PLA2G1B
310	ErbB4 Signaling	2.8E-01	0.524807	5.56E-02		-2.000	FGFR3,PLCG2,PIK3R6,NRG4
311	CCR3 Signaling in Eosinophils	2.8E-01	0.524807	5.38E-02		NaN	FGFR3,PLA2G4A,PLCB4,PLA2G1B,PIK3R6,GNAI1,MAPK13
312	Corticotropin Releasing Hormone Signaling	2.77E-01	0.528445	5.41E-02		-2.449	ADCY9,PRKAR2B,PLCG2,GNAI1,MAPK13,ELK1
313	Telomerase Signaling	2.77E-01	0.528445	5.41E-02		-1.342	FGFR3,ELF3,CDKN1A,PPM1L,PIK3R6,EGFR
314	Wnt/Î²-catenin Signaling	2.77E-01	0.528445	5.33E-02		0.000	FZD8,SRC,GJA1,FZD4,WNT7A,PPM1L,ACVR1,TGFB2,SOX13
315	Isoleucine Degradation I	2.76E-01	0.529663	7.14E-02		NaN	BCAT1
316	Androgen Biosynthesis	2.76E-01	0.529663	7.14E-02		NaN	AKR1C3
317	Triacylglycerol Degradation	2.76E-01	0.529663	5.66E-02		NaN	LIPF,LPL,PLA1A
318	Death Receptor Signaling	2.74E-01	0.532108	5.43E-02		-0.447	GAS2,TNFRSF21,Naip1 (includes others),ACTA2,TNFSF15
319	GM-CSF Signaling	2.71E-01	0.535797	5.48E-02		-2.000	FGFR3,CSF2RB,PIK3R6,ELK1
320	Retinoate Biosynthesis I	2.69E-01	0.53827	5.88E-02		NaN	DHRS9,AKR1C3
321	RAR Activation	2.68E-01	0.539511	5.26E-02		NaN	ADCY9,CSF2RB,SRC,PRKAR2B,DHRS9,AKR1C3,NRIP2,TGFB2,NR2F6,MAPK13
322	Ceramide Signaling	2.67E-01	0.540754	5.38E-02		-0.447	FGFR3,CTSD,PPM1L,SPHK1,PIK3R6
323	Role of Cytokines in Mediating Communication between Immune Cells	2.65E-01	0.54325	5.56E-02		NaN	IL1A,IL18,IL5
324	Vitamin-C Transport	2.57E-01	0.55335	6.67E-02		NaN	GSTO1
325	Melanoma Signaling	2.55E-01	0.555904	5.45E-02		NaN	FGFR3,CDKN1A,PIK3R6
326	Actin Nucleation by ARP-WASP Complex	2.46E-01	0.567545	5.36E-02		NaN	RHOQ,GNA12,RHOU
327	Role of PI3K/AKT Signaling in the Pathogenesis of Influenza	2.45E-01	0.568853	5.26E-02		-2.000	FGFR3,CCR5,PIK3R6,GNAI1
328	GDNF Family Ligand-Receptor Interactions	2.45E-01	0.568853	5.26E-02		-2.000	FGFR3,DOK4,PLCG2,PIK3R6
329	BMP signaling pathway	2.45E-01	0.568853	5.26E-02		-2.000	PRKAR2B,BMPR1A,BMP3,MAPK13
330	Interferon Signaling	2.45E-01	0.568853	5.56E-02		NaN	OAS1,BAK1
331	Î³-glutamyl Cycle	2.39E-01	0.576766	6.25E-02		NaN	ANPEP
332	Methylglyoxal Degradation III	2.39E-01	0.576766	6.25E-02		NaN	AKR1C3
333	Regulation of Cellular Mechanics by Calpain Protease	2.37E-01	0.579429	5.26E-02		NaN	SRC,CDK1,EGFR
334	Glutamate Receptor Signaling	2.37E-01	0.579429	5.26E-02		NaN	HOMER2,GRIN2D,SLC1A3
335	Cell Cycle Control of Chromosomal Replication	2.23E-01	0.598412	5.26E-02		NaN	POLE,DNA2
336	Ubiquinol-10 Biosynthesis (Eukaryotic)	2.22E-01	0.599791	5.88E-02		NaN	MICAL2
337	Methionine Degradation I (to Homocysteine)	2.22E-01	0.599791	5.88E-02		NaN	MAT1A
338	Differential Regulation of Cytokine Production in Macrophages and T Helper Cells by IL-17A and IL-17F	2.07E-01	0.620869	5.56E-02		NaN	CCL2
339	Valine Degradation I	2.07E-01	0.620869	5.56E-02		NaN	BCAT1
340	Cysteine Biosynthesis III (mammalia)	1.94E-01	0.639735	5.26E-02		NaN	MAT1A

## Sheet: CD8 Canonical Pathways
Position	Ingenuity Canonical Pathways	-log(p-value)	P value	Ratio	#Molecues of dataset/#Total molecules of the pathway	z-score	Molecules
1	cAMP-mediated signaling	2.67E00	0.00213796	4.04E-02	9/223	-1.000	P2RY13,GRK4,SRC,NAPEPLD,CAMK1,NPR3,PDE3A,PDE4A,ADORA3
2	Leukocyte Extravasation Signaling	2.28E00	0.00524807	3.81E-02	8/210	-0.816	SRC,CLDN5,TIMP1,FER,CXCL12,CLDN7,DLC1,MMP17
3	Lipoate Salvage and Modification	1.9E00	0.0125893	1E00	1/1	NaN	LIPT1
4	tRNA Splicing	1.89E00	0.0128825	7.69E-02	3/39	NaN	NAPEPLD,PDE3A,PDE4A
5	Phenylalanine Degradation IV (Mammalian, via Side Chain)	1.89E00	0.0128825	1.43E-01	2/14	NaN	ALDH2,MAOB
6	Role of Macrophages, Fibroblasts and Endothelial Cells in Rheumatoid Arthritis	1.78E00	0.0165959	2.91E-02	9/309	NaN	SRC,CEBPA,TLR7,CXCL12,VEGFC,Tlr13,LTBR,TNFSF13B,C5
7	G-Protein Coupled Receptor Signaling	1.66E00	0.0218776	2.94E-02	8/272	NaN	P2RY13,GRK4,SRC,NAPEPLD,NPR3,PDE3A,PDE4A,ADORA3
8	Lipoate Biosynthesis and Incorporation II	1.6E00	0.0251189	5E-01	1/2	NaN	LIPT1
9	Communication between Innate and Adaptive Immune Cells	1.59E00	0.025704	4.49E-02	4/89	NaN	TNFSF13,TLR7,Tlr13,TNFSF13B
10	Altered T Cell and B Cell Signaling in Rheumatoid Arthritis	1.57E00	0.0269153	4.44E-02	4/90	NaN	TNFSF13,TLR7,Tlr13,TNFSF13B
11	Fatty Acid Î±-oxidation	1.51E00	0.030903	9.09E-02		NaN	ALDH2,ALOXE3
12	Role of CHK Proteins in Cell Cycle Checkpoint Control	1.5E00	0.0316228	5.45E-02		NaN	CLSPN,E2F3,BRCA1
13	Putrescine Degradation III	1.48E00	0.0331131	8.7E-02		NaN	ALDH2,MAOB
14	Epithelial Adherens Junction Signaling	1.43E00	0.0371535	3.42E-02		NaN	SRC,NECTIN3,FER,TUBB4A,PTPRM
15	Tryptophan Degradation X (Mammalian, via Tryptamine)	1.41E00	0.0389045	8E-02		NaN	ALDH2,MAOB
16	Nicotine Degradation II	1.35E00	0.0446684	4.76E-02		NaN	CYP1A1,FMO2,INMT
17	Phenylethylamine Degradation I	1.31E00	0.0489779	2.5E-01		NaN	ALDH2
18	Melatonin Degradation II	1.31E00	0.0489779	2.5E-01		NaN	MAOB
19	Remodeling of Epithelial Adherens Junctions	1.25E00	0.0562341	4.35E-02		NaN	SRC,DNM3,TUBB4A
20	Chemokine Signaling	1.22E00	0.060256	4.23E-02		NaN	SRC,CAMK1,CXCL12
21	Pancreatic Adenocarcinoma Signaling	1.21E00	0.0616595	3.39E-02		NaN	NAPEPLD,VEGFC,HBEGF,E2F3
22	GÎ±i Signaling	1.19E00	0.0645654	3.33E-02		-1.000	P2RY13,SRC,NPR3,ADORA3
23	Role of Tissue Factor in Cancer	1.17E00	0.0676083	3.28E-02		NaN	F10,SRC,VEGFC,HBEGF
24	Gustation Pathway	1.15E00	0.0707946	3.23E-02		NaN	P2RY13,NAPEPLD,PDE3A,PDE4A
25	Dopamine Degradation	1.15E00	0.0707946	5.71E-02		NaN	ALDH2,MAOB
26	Pentose Phosphate Pathway (Non-oxidative Branch)	1.14E00	0.0724436	1.67E-01		NaN	TKTL1
27	Granulocyte Adhesion and Diapedesis	1.14E00	0.0724436	2.82E-02		NaN	CLDN5,CXCL12,CLDN7,MMP17,C5
28	Sertoli Cell-Sertoli Cell Junction Signaling	1.13E00	0.074131	2.81E-02		NaN	SRC,CLDN5,NECTIN3,TUBB4A,CLDN7
29	Role of BRCA1 in DNA Damage Response	1.12E00	0.0758578	3.85E-02		NaN	E2F3,BRCA1,BRIP1
30	Complement System	1.1E00	0.0794328	5.41E-02		NaN	C4A/C4B,C5
31	Inhibition of Matrix Metalloproteases	1.07E00	0.0851138	5.13E-02		NaN	TIMP1,MMP17
32	Noradrenaline and Adrenaline Degradation	1.05E00	0.0891251	5E-02		NaN	ALDH2,MAOB
33	Agranulocyte Adhesion and Diapedesis	1.04E00	0.0912011	2.65E-02		NaN	CLDN5,CXCL12,CLDN7,MMP17,C5
34	Crosstalk between Dendritic Cells and Natural Killer Cells	9.92E-01	0.101859	3.37E-02		NaN	CSF2RB,TLR7,LTBR
35	IL-8 Signaling	9.86E-01	0.103276	2.54E-02		-0.447	SRC,NAPEPLD,ANGPT2,VEGFC,HBEGF
36	Role of Oct4 in Mammalian Embryonic Stem Cell Pluripotency	9.44E-01	0.113763	4.35E-02		NaN	CCNF,BRCA1
37	Salvage Pathways of Pyrimidine Ribonucleotides	9.29E-01	0.117761	3.16E-02		NaN	GRK4,AK8,GRK5
38	Pentose Phosphate Pathway	9.25E-01	0.11885	1E-01		NaN	TKTL1
39	Relaxin Signaling	9.03E-01	0.125026	2.63E-02		NaN	NAPEPLD,PDE3A,PDE4A,NPR2
40	Purine Nucleotides De Novo Biosynthesis II	8.86E-01	0.130017	9.09E-02		NaN	ADSSL1
41	Mineralocorticoid Biosynthesis	8.86E-01	0.130017	9.09E-02		NaN	Cyp2d22
42	Glucocorticoid Biosynthesis	8.51E-01	0.140929	8.33E-02		NaN	Cyp2d22
43	Unfolded protein response	8.31E-01	0.147571	3.7E-02		NaN	CEBPA,HSPA2
44	Choline Biosynthesis III	8.19E-01	0.151705	7.69E-02		NaN	NAPEPLD
45	Bile Acid Biosynthesis, Neutral Pathway	8.19E-01	0.151705	7.69E-02		NaN	CYP27A1
46	Guanosine Nucleotides Degradation III	8.19E-01	0.151705	7.69E-02		NaN	NT5C2
47	Aldosterone Signaling in Epithelial Cells	8.04E-01	0.157036	2.41E-02		NaN	DNAJC12,DNAJA1,HSPA2,HSPB6
48	Tight Junction Signaling	7.98E-01	0.159221	2.4E-02		NaN	CLDN5,NECTIN3,CEBPA,CLDN7
49	DNA Double-Strand Break Repair by Homologous Recombination	7.9E-01	0.162181	7.14E-02		NaN	BRCA1
50	Urate Biosynthesis/Inosine 5'-phosphate Degradation	7.9E-01	0.162181	7.14E-02		NaN	NT5C2
51	Chondroitin Sulfate Degradation (Metazoa)	7.62E-01	0.172982	6.67E-02		NaN	ARSB
52	Germ Cell-Sertoli Cell Junction Signaling	7.6E-01	0.17378	2.31E-02		NaN	SRC,NECTIN3,FER,TUBB4A
53	Ephrin Receptor Signaling	7.54E-01	0.176198	2.3E-02		NaN	SRC,ARHGEF15,CXCL12,VEGFC
54	Extrinsic Prothrombin Activation Pathway	7.37E-01	0.183231	6.25E-02		NaN	F10
55	Dermatan Sulfate Degradation (Metazoa)	7.37E-01	0.183231	6.25E-02		NaN	FGFRL1
56	NF-ÎºB Signaling	7.18E-01	0.191426	2.22E-02		-2.000	TLR7,FGFRL1,LTBR,TNFSF13B
57	Adenosine Nucleotides Degradation II	7.13E-01	0.193642	5.88E-02		NaN	NT5C2
58	Pyridoxal 5'-phosphate Salvage Pathway	7.06E-01	0.196789	3.08E-02		NaN	GRK4,GRK5
59	Phagosome Formation	7.02E-01	0.198609	2.46E-02		NaN	Fcrls,TLR7,Tlr13
60	Colorectal Cancer Metastasis Signaling	6.98E-01	0.200447	2.02E-02		-1.342	SRC,TLR7,VEGFC,Tlr13,MMP17
61	Mitotic Roles of Polo-Like Kinase	6.96E-01	0.201372	3.03E-02		NaN	ESPL1,KIF11
62	Superpathway of Melatonin Degradation	6.86E-01	0.206063	2.99E-02		NaN	MAOB,CYP1A1
63	GADD45 Signaling	6.7E-01	0.213796	5.26E-02		NaN	BRCA1
64	Histamine Degradation	6.7E-01	0.213796	5.26E-02		NaN	ALDH2
65	DNA damage-induced 14-3-3Ïƒ Signaling	6.7E-01	0.213796	5.26E-02		NaN	BRCA1
66	Protein Ubiquitination Pathway	6.61E-01	0.218273	1.96E-02		NaN	DNAJC12,DNAJA1,BRCA1,HSPA2,HSPB6
67	Purine Nucleotides Degradation II (Aerobic)	6.51E-01	0.223357	5E-02		NaN	NT5C2
68	Oxidative Ethanol Degradation III	6.32E-01	0.233346	4.76E-02		NaN	ALDH2
69	STAT3 Pathway	6.31E-01	0.233884	2.74E-02		NaN	SRC,FGFRL1
70	Serotonin Degradation	6.23E-01	0.238232	2.7E-02		NaN	ALDH2,MAOB
71	TREM1 Signaling	6.15E-01	0.242661	2.67E-02		NaN	TLR7,Tlr13
72	Antiproliferative Role of Somatostatin Receptor 2	6.15E-01	0.242661	2.67E-02		NaN	SRC,NPR2
73	Cardiac Î²-adrenergic Signaling	6.06E-01	0.247742	2.19E-02		NaN	NAPEPLD,PDE3A,PDE4A
74	Breast Cancer Regulation by Stathmin1	5.98E-01	0.252348	1.97E-02		NaN	CAMK1,ARHGEF15,TUBB4A,E2F3
75	Pyrimidine Deoxyribonucleotides De Novo Biosynthesis I	5.98E-01	0.252348	4.35E-02		NaN	AK8
76	VDR/RXR Activation	5.9E-01	0.25704	2.56E-02		NaN	CEBPA,VDR
77	Erythropoietin Signaling	5.82E-01	0.261818	2.53E-02		NaN	SRC,EPOR
78	Tumoricidal Function of Hepatic Natural Killer Cells	5.82E-01	0.261818	4.17E-02		NaN	LYVE1
79	Estrogen-mediated S-phase Entry	5.82E-01	0.261818	4.17E-02		NaN	E2F3
80	Glutathione Redox Reactions I	5.82E-01	0.261818	4.17E-02		NaN	GPX2
81	Role of JAK family kinases in IL-6-type Cytokine Signaling	5.67E-01	0.271019	4E-02		NaN	OSMR
82	Bupropion Degradation	5.67E-01	0.271019	4E-02		NaN	CYP1A1
83	Ethanol Degradation IV	5.67E-01	0.271019	4E-02		NaN	ALDH2
84	Ovarian Cancer Signaling	5.66E-01	0.271644	2.08E-02		NaN	SRC,VEGFC,BRCA1
85	NAD Salvage Pathway II	5.52E-01	0.280543	3.85E-02		NaN	NT5C2
86	Glycolysis I	5.52E-01	0.280543	3.85E-02		NaN	FBP2
87	Gluconeogenesis I	5.52E-01	0.280543	3.85E-02		NaN	FBP2
88	Acetone Degradation I (to Methylglyoxal)	5.38E-01	0.289734	3.7E-02		NaN	CYP1A1
89	Bladder Cancer Signaling	5.25E-01	0.298538	2.3E-02		NaN	VEGFC,MMP17
90	Neuregulin Signaling	5.18E-01	0.303389	2.27E-02		NaN	SRC,HBEGF
91	G Beta Gamma Signaling	5.18E-01	0.303389	2.27E-02		NaN	SRC,HBEGF
92	Intrinsic Prothrombin Activation Pathway	5.13E-01	0.306902	3.45E-02		NaN	F10
93	eNOS Signaling	5.1E-01	0.30903	1.94E-02		NaN	AQP1,VEGFC,HSPA2
94	Acute Myeloid Leukemia Signaling	4.99E-01	0.316957	2.2E-02		NaN	CSF2RB,CEBPA
95	Reelin Signaling in Neurons	4.92E-01	0.322107	2.17E-02		NaN	SRC,ARHGEF15
96	FcÎ³ Receptor-mediated Phagocytosis in Macrophages and Monocytes	4.86E-01	0.326588	2.15E-02		NaN	SRC,NAPEPLD
97	Oncostatin M Signaling	4.56E-01	0.349945	2.94E-02		NaN	OSMR
98	Role of JAK2 in Hormone-like Cytokine Signaling	4.56E-01	0.349945	2.94E-02		NaN	EPOR
99	Acute Phase Response Signaling	4.47E-01	0.357273	1.78E-02		NaN	C4A/C4B,OSMR,C5
100	Coagulation System	4.46E-01	0.358096	2.86E-02		NaN	F10
101	Cell Cycle Regulation by BTG Family Proteins	4.46E-01	0.358096	2.86E-02		NaN	E2F3
102	Gap Junction Signaling	4.43E-01	0.360579	1.76E-02		NaN	SRC,TUBB4A,NPR2
103	RhoGDI Signaling	4.31E-01	0.370681	1.73E-02		NaN	SRC,ARHGEF15,DLC1
104	Protein Kinase A Signaling	4.31E-01	0.370681	1.53E-02		-0.816	NAPEPLD,PTPRU,PDE3A,PDE4A,PTPRM,PTPN21
105	Antioxidant Action of Vitamin C	4.29E-01	0.372392	1.94E-02		NaN	CSF2RB,NAPEPLD
106	VEGF Signaling	4.29E-01	0.372392	1.94E-02		NaN	SRC,VEGFC
107	Ethanol Degradation II	4.27E-01	0.374111	2.7E-02		NaN	ALDH2
108	April Mediated Signaling	4.18E-01	0.381944	2.63E-02		NaN	TNFSF13
109	Netrin Signaling	4.09E-01	0.389942	2.56E-02		NaN	UNC5B
110	Estrogen Biosynthesis	4.09E-01	0.389942	2.56E-02		NaN	CYP1A1
111	B Cell Activating Factor Signaling	4.01E-01	0.397192	2.5E-02		NaN	TNFSF13B
112	Thyroid Cancer Signaling	4.01E-01	0.397192	2.5E-02		NaN	CXCL12
113	Glioma Signaling	3.94E-01	0.403645	1.82E-02		NaN	CAMK1,E2F3
114	Hepatic Fibrosis / Hepatic Stellate Cell Activation	3.93E-01	0.404576	1.64E-02		NaN	TIMP1,COL4A3,VEGFC
115	Stearate Biosynthesis I (Animals)	3.93E-01	0.404576	2.44E-02		NaN	PORCN
116	UVC-Induced MAPK Signaling	3.85E-01	0.412098	2.38E-02		NaN	SRC
117	Pyrimidine Ribonucleotides Interconversion	3.77E-01	0.419759	2.33E-02		NaN	AK8
118	Serotonin Receptor Signaling	3.77E-01	0.419759	2.33E-02		NaN	MAOB
119	Neuropathic Pain Signaling In Dorsal Horn Neurons	3.76E-01	0.420727	1.75E-02		NaN	SRC,CAMK1
120	AMPK Signaling	3.72E-01	0.42462	1.59E-02		NaN	SRC,AK8,CFTR
121	HIF1Î± Signaling	3.72E-01	0.42462	1.74E-02		NaN	VEGFC,MMP17
122	Pyrimidine Ribonucleotides De Novo Biosynthesis	3.62E-01	0.43451	2.22E-02		NaN	AK8
123	Triacylglycerol Biosynthesis	3.55E-01	0.44157	2.17E-02		NaN	PORCN
124	PTEN Signaling	3.54E-01	0.442588	1.68E-02		NaN	PREX2,FGFRL1
125	ILK Signaling	3.49E-01	0.447713	1.53E-02		NaN	LIMS2,FERMT2,VEGFC
126	Clathrin-mediated Endocytosis Signaling	3.46E-01	0.450817	1.52E-02		NaN	SRC,DNM3,VEGFC
127	RhoA Signaling	3.42E-01	0.454988	1.64E-02		NaN	CDC42EP1,DLC1
128	Cell Cycle: G2/M DNA Damage Checkpoint Regulation	3.35E-01	0.462381	2.04E-02		NaN	BRCA1
129	Sperm Motility	3.3E-01	0.467735	1.6E-02		NaN	SLC9A5,PDE4A
130	Thrombin Signaling	3.27E-01	0.470977	1.48E-02		NaN	SRC,CAMK1,ARHGEF15
131	FXR/RXR Activation	3.27E-01	0.470977	1.59E-02		NaN	C4A/C4B,CYP27A1
132	Atherosclerosis Signaling	3.23E-01	0.475335	1.57E-02		NaN	CXCL12,ALOXE3
133	GNRH Signaling	3.15E-01	0.484172	1.55E-02		NaN	SRC,DNM3
134	14-3-3-mediated Signaling	3.12E-01	0.487528	1.54E-02		NaN	SRC,TUBB4A
135	Cellular Effects of Sildenafil (Viagra)	3.12E-01	0.487528	1.54E-02		NaN	PDE3A,PDE4A
136	Xenobiotic Metabolism Signaling	3.12E-01	0.487528	1.39E-02		NaN	MAOB,CYP1A1,CAMK1,FMO2
137	Nicotine Degradation III	3.05E-01	0.49545	1.85E-02		NaN	CYP1A1
138	Axonal Guidance Signaling	3.04E-01	0.496592	1.34E-02		NaN	ARHGEF15,UNC5B,CXCL12,VEGFC,TUBB4A,PLXNA2
139	Adipogenesis pathway	2.98E-01	0.503501	1.49E-02		NaN	CEBPA,FGFRL1
140	Regulation of Cellular Mechanics by Calpain Protease	2.89E-01	0.514044	1.75E-02		NaN	SRC
141	Role of Pattern Recognition Receptors in Recognition of Bacteria and Viruses	2.88E-01	0.515229	1.46E-02		NaN	TLR7,C5
142	MSP-RON Signaling Pathway	2.79E-01	0.526017	1.69E-02		NaN	CSF2RB
143	Aryl Hydrocarbon Receptor Signaling	2.78E-01	0.52723	1.43E-02		NaN	SRC,CYP1A1
144	D-myo-inositol (1,4,5,6)-Tetrakisphosphate Biosynthesis	2.69E-01	0.53827	1.4E-02		NaN	PPFIBP2,PTPRM
145	D-myo-inositol (3,4,5,6)-tetrakisphosphate Biosynthesis	2.69E-01	0.53827	1.4E-02		NaN	PPFIBP2,PTPRM
146	Systemic Lupus Erythematosus Signaling	2.68E-01	0.539511	1.33E-02		NaN	TLR7,TNFSF13B,C5
147	Melatonin Degradation I	2.64E-01	0.544503	1.61E-02		NaN	CYP1A1
148	Phospholipases	2.64E-01	0.544503	1.61E-02		NaN	NAPEPLD
149	ERK5 Signaling	2.6E-01	0.549541	1.59E-02		NaN	SRC
150	PCP pathway	2.6E-01	0.549541	1.59E-02		NaN	PRICKLE1
151	Cell Cycle: G1/S Checkpoint Regulation	2.55E-01	0.555904	1.56E-02		NaN	E2F3
152	Lymphotoxin Î² Receptor Signaling	2.43E-01	0.571479	1.49E-02		NaN	LTBR
153	GABA Receptor Signaling	2.43E-01	0.571479	1.49E-02		NaN	GABRP
154	Eicosanoid Signaling	2.43E-01	0.571479	1.49E-02		NaN	CYSLTR2
155	EGF Signaling	2.39E-01	0.576766	1.47E-02		NaN	SRC
156	Agrin Interactions at Neuromuscular Junction	2.35E-01	0.582103	1.45E-02		NaN	SRC
157	Glioma Invasiveness Signaling	2.31E-01	0.587489	1.43E-02		NaN	TIMP1
158	3-phosphoinositide Degradation	2.3E-01	0.588844	1.27E-02		NaN	PPFIBP2,PTPRM
159	Caveolar-mediated Endocytosis Signaling	2.27E-01	0.592925	1.41E-02		NaN	SRC
160	Glioblastoma Multiforme Signaling	2.25E-01	0.595662	1.26E-02		NaN	SRC,E2F3
161	Ephrin B Signaling	2.19E-01	0.603949	1.37E-02		NaN	CXCL12
162	GM-CSF Signaling	2.19E-01	0.603949	1.37E-02		NaN	CSF2RB
163	Toll-like Receptor Signaling	2.16E-01	0.608135	1.35E-02		NaN	TLR7
164	Heparan Sulfate Biosynthesis (Late Stages)	2.09E-01	0.618016	1.32E-02		NaN	GLCE
165	Angiopoietin Signaling	2.06E-01	0.6223	1.3E-02		NaN	ANGPT2
166	Estrogen-Dependent Breast Cancer Signaling	2.06E-01	0.6223	1.3E-02		NaN	SRC
167	Dopamine Receptor Signaling	2.06E-01	0.6223	1.3E-02		NaN	MAOB
168	Cyclins and Cell Cycle Regulation	2.02E-01	0.628058	1.28E-02		NaN	E2F3
